# Supplementary material for: Longitudinal study of glomerular hyperfiltration in adults with sickle cell anemia: a multicenter pooled analysis
Source: PubMed Central journal article supplement — Blood Adv. 2022 Jun 15;6(15):4461–70. doi: 10.1182/bloodadvances.2022007693 (PMC9636315; doi:10.1182/bloodadvances.2022007693), 2022-06-15
Supplement: mmc1.pdf [file mmc1.pdf]

**Supplementary Table 1: Baseline Demographic, Laboratory and Clinical Variables in Individual Patient Cohorts (CKD-EPI-2009)**

| Characteristic                             | N   | UNC Cohort<br>Number (%)/Median (IQR) | N   | Duke Cohort<br>Number (%)/Median (IQR) | N   | UIC Cohort<br>Number (%)/Median (IQR) | N   | Methodist Cohort<br>Number (%)/Median (IQR) |
|--------------------------------------------|-----|---------------------------------------|-----|----------------------------------------|-----|---------------------------------------|-----|---------------------------------------------|
| Age                                        | 199 | 26.0 (20.0, 34.0)                     | 171 | 25.0 (20.0, 35.0)                      | 65  | 29.4 (23.6, 39.5)                     | 71  | 18 (18, 18)                                 |
| Sex (female)                               | 199 | 106 (53.3)                            | 171 | 90 (52.6)                              | 65  | 39 (60.0)                             | 71  | 33 (46.5)                                   |
| Weight (kg)                                | 196 | 64.6 (56.6, 74.6)                     | 146 | 66.4 (59.2, 75.5)                      | 56  | 68.0 (61.0, 72.6)                     | 67  | 58.6 (53.2, 66.2)                           |
| Height (cm)                                | 83  | 170.5 (163.0, 176.3)                  | N/A | N/A                                    | 59  | 170.2 (165.1, 175.3)                  | 70  | 167.7 (161.3, 174.4)                        |
| Body Mass Index (kg/m <sup>2</sup> )       | 83  | 22.0 (20.3, 24.8)                     | N/A | N/A                                    | 56  | 23.0 (21.0, 25.4)                     | 67  | 20.9 (19.2, 23.1)                           |
| WBC (x10 <sup>9</sup> /L)                  | 199 | 10.9 (8.5, 13.1)                      | 133 | 10.5 (7.9, 13.2)                       | 65  | 10.8 (8.3, 12.9)                      | 71  | 9.0 (6.8, 13.6)                             |
| Hemoglobin (g/dL)                          | 199 | 9.1 (8.0, 10.2)                       | 133 | 8.7 (7.7, 10.0)                        | 65  | 8.9 (8.1, 9.7)                        | 71  | 9.5 (8.9, 10.3)                             |
| Hematocrit (%)                             | 199 | 26.5 (23.2, 29.5)                     | 133 | 24.7 (22.0, 28.0)                      | 64  | 26.9 (23.7, 29.0)                     | 70  | 27.7 (25.7, 30.0)                           |
| Reticulocyte Count (x10 <sup>9</sup> /L)   | 187 | 224.8 (161.7, 308.2)                  | 114 | 295.3 (214.7, 425.5)                   | 65  | 370.0 (275.0, 467.0)                  | 6   | 160.9 (119.6, 226.4)                        |
| Platelet Count (x10 <sup>9</sup> /L)       | 193 | 434.0 (321.0, 546.0)                  | 133 | 405.7 (299.3, 473.0)                   | 65  | 473.0 (372.0, 549.0)                  | 71  | 360 (263, 453)                              |
| Baseline eGFR (mL/min/1.73m <sup>2</sup> ) | 199 | 125.5 (113.4, 137.8)                  | 171 | 128.0 (115.7, 137.8)                   | 65  | 122.3 (110.4, 130.7)                  | 71  | 143.7 (137.4, 151.3)                        |
| Blood Urea Nitrogen (mg/dL)                | 190 | 7.0 (6.0, 9.0)                        | N/A | N/A                                    | 65  | 6.0 (6.0, 8.0)                        | N/A | N/A                                         |
| Total Bilirubin (mg/dL)                    | 182 | 2.5 (1.5, 4.3)                        | 124 | 2.60 (1.6, 4.4)                        | 63  | 2.60 (1.90, 4.60)                     | 71  | 2.4 (1.6, 3.8)                              |
| Direct Bilirubin (mg/dL)                   | 46  | 0.09 (0.09, 0.10)                     | N/A | N/A                                    | 61  | 0.40 (0.30, 0.70)                     | 64  | 0.3 (0.2, 0.3)                              |
| Indirect Bilirubin (mg/dL)                 | 46  | 2.31 (1.70, 3.91)                     | N/A | N/A                                    | 62  | 2.30 (1.50, 3.60)                     | 64  | 2.35 (1.6, 3.6)                             |
| Ferritin (ng/mL)                           | 85  | 293.0 (122, 893.0)                    | 100 | 447 (178, 1154.5)                      | 56  | 592 (137.5, 1267)                     | 24  | 992 (607, 2815.5)                           |
| Hemoglobinuria (Yes)                       | 104 | 11 (10.6)                             | 129 | 12 (9.3)                               | 62  | 19 (30.7)                             | N/A | N/A                                         |
| Proteinuria* (Yes)                         | 114 | 19 (16.7)                             | 129 | 24 (18.6)                              | N/A | N/A                                   | N/A | N/A                                         |
| Hemoglobin F (%)                           | 96  | 6.15 (3.4, 10.4)                      | 88  | 10.7 (4.9, 18.0)                       | 65  | 6.6 (3.4, 9.7)                        | 60  | 9.8 (3.7, 18.4)                             |
| H/O Acute Chest Syndrome (Yes)             | 194 | 170 (87.6)                            | 146 | 114 (78.1)                             | 65  | 36 (55.4)                             | 71  | 40 (56.3)                                   |
| H/O Stroke (Yes)                           | 185 | 29 (15.7)                             | 144 | 33 (22.9)                              | 65  | 18 (27.7)                             | 71  | 6 (8.5)                                     |
| H/O Leg Ulcers (Yes)                       | 167 | 25 (15.0)                             | 142 | 22 (15.5)                              | 65  | 8 (12.3)                              | 71  | 0 (0)                                       |
| H/O Priapism** (Yes)                       | 82  | 36 (43.9)                             | 66  | 28 (42.4)                              | 22  | 5 (22.7)                              | N/A | N/A                                         |
| H/O Avascular Necrosis (Yes)               | 136 | 55 (40.4)                             | 141 | 41 (29.1)                              | 65  | 22 (33.9)                             | N/A | N/A                                         |

|                                  |     |                |     |                |    |                |     |                      |
|----------------------------------|-----|----------------|-----|----------------|----|----------------|-----|----------------------|
| Systolic Blood Pressure (mm Hg)  | 199 | 117 (108, 129) | 145 | 116 (109, 125) | 65 | 116 (109, 124) | 69  | 118·0 (110·0, 125·0) |
| Diastolic Blood Pressure (mm Hg) | 199 | 68 (60, 74)    | 145 | 68 (63, 73)    | 65 | 69 (62, 74)    | 69  | 61·0 (57·0, 69·0)    |
| H/O Diabetes (Yes)               | 199 | 5 (2·5)        | 127 | 0 (0)          | 65 | 1 (1·5)        | 71  | 0 (0)                |
| Chronic RBC Transfusion (Yes)    | 199 | 7 (3·5)        | 145 | 10 (6·9)       | 65 | 7 (10·8)       | 71  | 26 (36·6)            |
| Hydroxyurea Therapy (Yes)        | 197 | 83 (42·1)      | 171 | 92 (53·8)      | 65 | 37 (56·9)      | 71  | 60 (84·5)            |
| RAAS Blocking Agents (Yes)       | 198 | 12 (6·1)       | N/A | N/A            | 65 | 5 (7·7)        | N/A | N/A                  |

CKD-EPI-2009 - Chronic Kidney Disease Epidemiology Collaboration formula for estimated glomerular filtration rate (omitting adjustment for black race); utilizing serum creatinine

\* Proteinuria – at least 1+ by dipstick urinalysis

\*\*Male patients only

RAAS Blocking Agents – Renin-angiotensin-aldosterone system blocking agents (Angiotensin-converting enzyme inhibitors and angiotensin receptor blockers).

WBC – White blood cell count; RBC = red blood cell

N/A – Not available

**Supplementary Table 2: Baseline Demographic, Laboratory and Clinical Variables in Individual Patient Cohorts (CKD-EPI-2021)**

| Characteristic                             | N   | UNC Cohort<br>Number (%) / Median (IQR) | N   | Duke Cohort<br>Number (%) / Median (IQR) | N  | UIC Cohort<br>Number (%) / Median (IQR) | N   | Methodist Cohort<br>Number (%) / Median (IQR) |
|--------------------------------------------|-----|-----------------------------------------|-----|------------------------------------------|----|-----------------------------------------|-----|-----------------------------------------------|
| Age                                        | 202 | 26.5 (20.0, 35.0)                       | 172 | 25.5 (20.5, 35.0)                        | 71 | 31.6 (24.0, 41.2)                       | 71  | 18 (18, 18)                                   |
| Sex (female)                               | 202 | 108 (53.5)                              | 172 | 90 (52.3)                                | 71 | 42 (59.2)                               | 71  | 33 (46.5)                                     |
| Weight (kg)                                | 199 | 64.7 (56.6, 74.7)                       | 147 | 66.5 (59.2, 76.0)                        | 62 | 68.0 (61.2, 72.6)                       | 67  | 58.6 (53.2, 66.2)                             |
| Height (cm)                                | 83  | 170.5 (163.0, 176.3)                    | N/A | N/A                                      | 65 | 170.2 (165.1, 175.3)                    | 70  | 167.7 (161.3, 174.4)                          |
| Body Mass Index (kg/m <sup>2</sup> )       | 83  | 22.0 (20.3, 24.8)                       | N/A | N/A                                      | 62 | 23.3 (21.0, 25.7)                       | 67  | 20.9 (19.2, 23.1)                             |
| WBC (x10 <sup>9</sup> /L)                  | 202 | 11.0 (8.5, 13.1)                        | 134 | 10.5 (7.9, 13.2)                         | 71 | 10.4 (7.9, 12.9)                        | 71  | 9.0 (6.8, 13.6)                               |
| Hemoglobin (g/dL)                          | 202 | 9.1 (8.0, 10.2)                         | 134 | 8.7 (7.7, 10.0)                          | 71 | 8.8 (7.9, 9.7)                          | 71  | 9.5 (8.9, 10.3)                               |
| Hematocrit (%)                             | 202 | 26.5 (23.2, 29.5)                       | 134 | 24.7 (22.0, 28.0)                        | 70 | 26.4 (23.3, 28.9)                       | 70  | 27.7 (25.7, 30.0)                             |
| Reticulocyte Count (x10 <sup>9</sup> /L)   | 190 | 224.6 (160.1, 306.9)                    | 115 | 296.3 (214.7, 429.7)                     | 71 | 360.0 (271.0, 467.0)                    | 6   | 160.9 (119.6, 226.4)                          |
| Platelet Count (x10 <sup>9</sup> /L)       | 196 | 434.0 (320.0, 547.0)                    | 134 | 407.3 (299.3, 493.0)                     | 71 | 466.0 (358.0, 562.0)                    | 71  | 360 (263, 453)                                |
| Baseline eGFR (mL/min/1.73m <sup>2</sup> ) | 202 | 126.4 (115.7, 135.9)                    | 172 | 128.6 (117.5, 136.1)                     | 71 | 122.3 (107.1, 130.6)                    | 71  | 140.7 (136.4, 146.5)                          |
| Blood Urea Nitrogen (mg/dL)                | 193 | 7.0 (6.0, 9.0)                          | N/A | N/A                                      | 71 | 6.0 (4.0, 9.0)                          | N/A | N/A                                           |
| Total Bilirubin (mg/dL)                    | 185 | 2.5 (1.5, 4.3)                          | 125 | 2.60 (1.6, 4.5)                          | 69 | 2.60 (2.0, 4.30)                        | 71  | 2.4 (1.6, 3.8)                                |
| Direct Bilirubin (mg/dL)                   | 46  | 0.09 (0.09, 0.10)                       | N/A | N/A                                      | 67 | 0.50 (0.30, 0.70)                       | 64  | 0.3 (0.2, 0.3)                                |
| Indirect Bilirubin (mg/dL)                 | 46  | 2.31 (1.70, 3.91)                       | N/A | N/A                                      | 68 | 2.25 (1.60, 3.55)                       | 64  | 2.35 (1.6, 3.6)                               |
| Ferritin (ng/mL)                           | 86  | 293.5 (122.0, 924.0)                    | 101 | 432 (172, 1127.0)                        | 61 | 590 (135.0, 1258)                       | 24  | 992 (607, 2815.5)                             |
| Hemoglobinuria (Yes)                       | 105 | 11 (10.5)                               | 130 | 13 (10.0)                                | 68 | 21 (30.9)                               | N/A | N/A                                           |
| Proteinuria* (Yes)                         | 115 | 19 (16.5)                               | 130 | 25 (19.2)                                | 17 | 5 (29.4)                                | N/A | N/A                                           |
| Hemoglobin F (%)                           | 98  | 6.15 (3.4, 10.4)                        | 89  | 10.7 (5.0, 17.9)                         | 71 | 6.7 (3.4, 9.8)                          | 60  | 9.8 (3.7, 18.4)                               |
| H/O Acute Chest Syndrome (Yes)             | 196 | 172 (87.8)                              | 147 | 115 (78.2)                               | 71 | 39 (54.9)                               | 71  | 40 (56.3)                                     |
| H/O Stroke (Yes)                           | 187 | 29 (15.5)                               | 145 | 33 (22.8)                                | 71 | 20 (28.2)                               | 71  | 6 (8.5)                                       |
| H/O Leg Ulcers (Yes)                       | 170 | 26 (15.3)                               | 143 | 23 (16.1)                                | 71 | 11 (15.5)                               | 71  | 0 (0)                                         |
| H/O Priapism** (Yes)                       | 82  | 36 (43.9)                               | 67  | 28 (41.8)                                | 25 | 6 (24.0)                                | N/A | N/A                                           |

|                                  |     |                |     |                  |    |                |     |                      |
|----------------------------------|-----|----------------|-----|------------------|----|----------------|-----|----------------------|
| H/O Avascular Necrosis (Yes)     | 139 | 57 (41·0)      | 142 | 42 (29·6)        | 71 | 26 (36·6)      | N/A | N/A                  |
| Systolic Blood Pressure (mm Hg)  | 202 | 117 (108, 129) | 146 | 116·5 (109, 125) | 71 | 116 (109, 125) | 69  | 118·0 (110·0, 125·0) |
| Diastolic Blood Pressure (mm Hg) | 202 | 68 (60, 75)    | 146 | 68 (63, 73)      | 71 | 69 (62, 75)    | 69  | 61·0 (57·0, 69·0)    |
| H/O Diabetes (Yes)               | 202 | 6 (3·0)        | 128 | 0 (0)            | 71 | 1 (1·4)        | 71  | 0 (0)                |
| Chronic RBC Transfusion (Yes)    | 202 | 7 (3·5)        | 146 | 10 (6·9)         | 71 | 7 (9·9)        | 71  | 26 (36·6)            |
| Hydroxyurea Therapy (Yes)        | 200 | 85 (42·5)      | 172 | 92 (53·5)        | 71 | 40 (56·3)      | 71  | 60 (84·5)            |
| RAAS Blocking Agents (Yes)       | 201 | 12 (6·0)       | N/A | N/A              | 71 | 7 (9·9)        | N/A | N/A                  |

CKD-EPI-2009 - Chronic Kidney Disease Epidemiology Collaboration formula for estimated glomerular filtration rate (omitting adjustment for black race); utilizing serum creatinine

\* Proteinuria – at least 1+ by dipstick urinalysis

\*\*Male patients only

RAAS Blocking Agents – Renin-angiotensin-aldosterone system blocking agents (Angiotensin-converting enzyme inhibitors and angiotensin receptor blockers).

WBC – White blood cell count; RBC = red blood cell

N/A – Not available
